# Supplementary material
Source: PubMed Central journal article supplement (PMC5648907)
Supplement: AEM.01659-17_zam999118132s1.pdf [file AEM.01659-17_zam999118132s1.pdf]

```

L. brevis PDH (WP_011668081)   MANGSKQIVDFAKIKATMADPYKHPVQV IDREGKVVDPTLAKYSDDQLVDFMKKMVWER
L. plantarum PDH (YP_004889896) -MDNEKP IVDFGAIRDVLGKDF-EPVQVLDGQAKVIKPEIVSKYSNEQLVEFFKMLWLER
L. spicheri PDH (WP_045807982) MANGSKQFVDFAKIKATMADPYKHPVQV IDREGKVVNPDILA EYSDDQLVDFMKKMVWER
L. buchneri PDH (WP_014939653)  MAAKSKHVDFAKIKSTMSDPYKHPVQV IDESGKIVNQLDFQFSDDELVTLMKMWVER
      . * . * * * . * : . . . : . * * * * : * . * : . . : : * * * * : * : * * * *

```

```

L. brevis PDH (WP_011668081)   TLHEQTMNFSRQGRLGFYAPTAGEEASEMGSVTAFKEQDYLLPAYRDL PQMIQHGTTVAK
L. plantarum PDH (YP_004889896) TLHQRSNALTRQGRLGFYAPTEGQ EASEMGSNAAAMKKT DVLMPAYRDI PQLIQHGLPVYK
L. spicheri PDH (WP_045807982) TLHEQTMNFSRQGRLGFYAPTAGEEASEMGSVTAFKEQDFLLPAYRDL PQMIQH GASVAK
L. buchneri PDH (WP_014939653)  ALHEQTMNFSRQGRLGFYAPTYGEEASEMGIAHAMKKQDYLPAYRDL PQLIQH GATVKE
      : * * : : : : * * * * * * * * * * * * * * * * * * * * * * * * * * * * * * :

```

```

L. brevis PDH (WP_011668081)   GFLWSKGHVEGNQH--ENPNMFPPQII IGAQYVETAGVALGIKKNGDED R VAFAYTGDGG
L. plantarum PDH (YP_004889896) AFLWSRGHVLGNEY P-EDFHAMP P QII IGAQYVQAAGVALGIKKNGTEDKVAYTYTGDGG
L. spicheri PDH (WP_045807982) GFLWSKGHI EGNQY--DNPNMI FPQII IGAQYVETAGVALGIQKNGDKDRVAFVYTGDGG
L. buchneri PDH (WP_014939653)  GYLWSKGHYQAYDYVRRG VRAFI PQII IGAQYVQSAGAA LGIKKNGEKDTVAYTFTGDGG
      . : * * * * : * . : . . : * * * * * * * * * * : * * * * * * * * * * * *

```

```

L. brevis PDH (WP_011668081)   TSQGDWYEGVNFTSAYQAPAVFFVQNNGWAI SVPRKQTAAETLAQKAVAMGVPSVQVDG
L. plantarum PDH (YP_004889896) TSQGDFYEGMNFAGAFEAPAVFIVQNNGVAI SVPRRQTAAETLAQKAVAA GIPSVQVDG
L. spicheri PDH (WP_045807982) TSQGDWYEGINFTSAYQAPAVFFVQNNGWAI SVPRRQTAAETLAQKAVAMGVPSVQVDG
L. buchneri PDH (WP_014939653)  TSQGDFYEGINFASSFAQAPEVFFVQNNGWAI SVPRKTQTAETLAQKGVASGVPGVQVDG
      * * * * * * * * * * : : : * * * * * * * * * * : . * * * * * * * * * * * * *

```

```

L. brevis PDH (WP_011668081)   MDIVAVHEVSKAAAREFAAAGNGPVV IETLT YRYGAHSSAGDDPSRYRTEKEEK PWF DADP
L. plantarum PDH (YP_004889896) MDFLAVYEVTKAAREYAAAGNGPVM IETLT YRFGPHTNAGDDPKRYR TKDEEQPWF DNDP
L. spicheri PDH (WP_045807982) MDIVAVHEVAKEAREFAAAGNGPVV IETLT YRYGAHSSAGDDPSRYRTEKEEK PWF DADP
L. buchneri PDH (WP_014939653)  MDILATYLVAKEARDFV VAGNGPALVETLT YRFGAHSAGDDPSRYRTEKEE KPWFDRDP
      * * : * : * * * * . . * * * * . : * * * * * * * * * * * * : * * * * * * *

```

```

L. brevis PDH (WP_011668081)   LVRLRKVLTDKGVWSQDQDKLVDGYKDEFKQAMKEAEAAPAKVSDFLKWTYNVPTPAV
L. plantarum PDH (YP_004889896) LIRYRKVLTDQGVWSE DQEN EYVEQVKEDIKAAV KQADEAPKQKMTEFLGNVFEEQPQNI
L. spicheri PDH (WP_045807982) LIRMRKVLTDKKLWSQDQDKLVEEYKDEFKNAMKEAEAAPAKVSDFLKWTYNVPTPAV
L. buchneri PDH (WP_014939653)  LIRLRKVLTDKKLW DQDKEDKLVAQYKDEFKEAMKDAEAAPKQVSDFLKNTFVPTPAV
      * : * * * * : * . : * : * * * * * * * * * * * * * * * * * * * * * * : :

```

```

L. brevis PDH (WP_011668081)   KKQIAEFEAKESK
L. plantarum PDH (YP_004889896) QQQIT E FQAKESK
L. spicheri PDH (WP_045807982) KKQIAEFEAKESK
L. buchneri PDH (WP_014939653)  AADIKKYEAKESK
      : * : : * * * * *

```

FIG S1 Sequence alignment of the PDH (WP\_011668081) from *L. brevis* ATCC367, PDH (YP\_004889896) from *L. plantarum* WCFS1, PDH (WP\_045807982) from *L. buchneri* CD034 and PDH (WP\_014939653) from *L. spicheri* DSM 15429. The PDH of *L. brevis* ATCC367 shared 93.26%, 72.12% and 63.98% identities to the PDHs of *L. spicheri* DSM 15429, *L. buchneri* CD034 and *L. plantarum* WCFS1

*L. brevis* POX (WP\_011667107) -----MTKMIAGQALVKVLEAWDIDHIYGI PPGSINHTVEGLYLEKEHINYIQRHEE  
*L. plantarum* POX1 (YP\_004888816) -----MAKISGSDAVLKVIVKQWGVKHIYGL PPGSFDSTMNAIYNQRKTLKYIQRHEE  
*L. plantarum* POX2 (YP\_004888818) -----MMTKMIAGQALVKVLEAWGDHIYGI PPGSINHTVEGLYLEKADIDYIQRHEE  
*L. plantarum* POX3 (YP\_004890281) -----MAKMIEASVAMLKVIEAWDVKQIYGYAGGSFNSTMHALDVEQERLQYVQRHEE  
*L. plantarum* POX4 (YP\_004891062) -----MEMTKIKAGQALAVLVDWNIDHIYGI TADSINNTVDGFYQEKDHLKYIQRHEE  
*L. plantarum* POX5 (YP\_004891064) MVMKQTKQTNILAGAAVVKVLEAWGDHLYGI PPGSINSIMDALSAERDRIHYIQRHEE  
*L. spicheri* POX (WP\_056963531) -----  
*L. buchneri* POX1 (WP\_014939235) -----MTKMIAGQALVKVLEDWGDHVGIP PPGSINHTVEGLYLEKDKMKYIQRHEE  
*L. buchneri* POX2 (WP\_014939725) -----MAETINSGIAALHTLESWGDHIYGI PPGTINNLMYALDAEKDKITYVHVRHEE  
*L. buchneri* POX3 (WP\_014940497) -----MVETISGSDAVLKVLEQWGVKNIYGL PPGSFDSTMNAIHNQKQINYYVQRHEE  
*L. buchneri* POX4 (WP\_014940827) -----MAKMTAGQALAKVLSWVIDHLYGI TADSINNTVDGLYQERDKIKYIQRHEE

*L. brevis* POX (WP\_011667107) VGALAAAADAKFTGKIGVAFGSAGPGATHL FNGLYDAKMDHVPMLAIVGQVPQSTMNTNY  
*L. plantarum* POX1 (YP\_004888816) AGAIAASADYKLTGKIGVCFGSAGPGAVHLL NGLYDAKEDGIPMLAIVAQVPTKRMNMDF  
*L. plantarum* POX2 (YP\_004888818) VGALAAADAKFTGKIGVSFGSAGPGATHL FNGLYDAKMDHVPVLLVGVQVPQATMNTNY  
*L. plantarum* POX3 (YP\_004890281) VGALAAAADAKLTGKIGVAFGSAGPGAVNLL NGLYDAKEDHVPVLLVGVQVHTNMNYDY  
*L. plantarum* POX4 (YP\_004891062) VGALAAAADAKLTGTIGVSFGSAGPGAVHLL NGLYDAKMDHVPVLLVGSATSIMNTNF  
*L. plantarum* POX5 (YP\_004891064) VGAMAAAADAKLTGKIGVCFGSAGPGGTHL MNGLYDAREDHVPVLLVIGQFGTGMNMDT  
*L. spicheri* POX (WP\_056963531) -----ADAKYTGKIGVSFGSAGPGATHL FNGLYDAKMDHVPVLAIVGQVPQSAMNTNY  
*L. buchneri* POX1 (WP\_014939235) VGATAASADAKFTGKIGVAFGSAGPGATHL FNGLYDAKMDHVPVLLVGVQVPQPTMNTNY  
*L. buchneri* POX2 (WP\_014939725) VGALAAVADSKLTGHIGVAFGSAGPGATHL YQAYDAMADKVPVLLVIGQNPQALMNQDF  
*L. buchneri* POX3 (WP\_014940497) AGAIAAAATAKLTGKVGVSFGSAGPGAVHLL NGLYDAKSDGVPVVALVAQVPTGSMNMDF  
*L. buchneri* POX4 (WP\_014940827) VGSLAATAADAKLTGKVGVSFGSAGPGATHL FNGLYDAKMDHAPVVAIVGQSATPIMNTYF

\* \* \* \* :\*:\*\*\*\*\*. : \* : \* \* \* \* \* \* : : : \* \* \*

*L. brevis* POX (WP\_011667107) FQEMDETPMFSADVAVNRTATTAEQLPYVINQA IREAYRQKGPVAVIIPEDLSATEIDYE  
*L. plantarum* POX1 (YP\_004888816) FQAMNEEPIFDDVAVWNRTAMTAESLPMMTDEA IRQAYAHNGVAVLTIKDFGWAEIED-  
*L. plantarum* POX2 (YP\_004888818) FQEMDETPMFSADVAVDRVTTAGQLPYVINQA IREAYRQKGPVAVIIPENLSAEEIDYQ  
*L. plantarum* POX3 (YP\_004890281) FQEFAEPIFSDVAVFNRTVMTPELSPYVVDKAI RTAYRENGVAVVTIPNDFGYVEIPDL  
*L. plantarum* POX4 (YP\_004891062) FQEMNQDPIFADVAEFHKQVTTAEQIPYVVD EAIRSAYATRSVSVVIIPDDLSGQDIKFD  
*L. plantarum* POX5 (YP\_004891064) FQEMNENPIYADVADYNVAVNAATLPHVIDEAI RRAYAHQGVAVVQIPVDLPWQQIPAE  
*L. spicheri* POX (WP\_056963531) FQEMDETPMFSADVAVNRTATTAEQLPYVINQA IREAYRQKGPVAVIIPEDLSTTEIDYE  
*L. buchneri* POX1 (WP\_014939235) FQEMDETPMFSADVAVNRTATTAEQIPYVINQA IREAYRQKGPVAVIIPEDLSTTEIDYE  
*L. buchneri* POX2 (WP\_014939725) FQEFDENPWFKDGAVYARTVMTAQSLPHILDEA IRRFAHQHPAVITIPNDLANKEIPAD  
*L. buchneri* POX3 (WP\_014940497) FQAMDEEPIFDDVAVWNRTAMTADALPRMTDEA IRQAYMKHGVAVLTIKDLGWAQIND-  
*L. buchneri* POX4 (WP\_014940827) FQEMDQDPLFVDLTDHFHKQVTNPEQIPYVMD EAIRYAYQTKGPVAVIIPDNLSGEEIDFE

\*\* : : \* : \* : . . : \* : : \* \* : \* : . : : \* : : : \*

*L. brevis* POX (WP\_011667107) PVKTPNVVA-NTFTQVVDPAVKATLELLKAAKHPLIYAGRLLGARAELVKFSEQFNIP  
*L. plantarum* POX1 (YP\_004888816) NFETNASVH-TVNYPAPTAESVADAVKL IKAASPMIYFGVGAKDAEELKAASEKFKMP  
*L. plantarum* POX2 (YP\_004888818) PVSTPNTVS-DTFEQRVDPQAITATLKM LKAAKHPLVYAGRLLGAKADLVKFSEQFNIP  
*L. plantarum* POX3 (YP\_004890281) NYDSASVPAKLTGIPITIDDEQVKT VLTMIKNAKYPVFHVGGTRGATEDMMALAERLQVP  
*L. plantarum* POX4 (YP\_004891062) GFKTASLSG-SQQVLMPLKDDVQQTIAALKAAQHPVLWIGKAYNARQEVI AVSEKFSLP  
*L. plantarum* POX5 (YP\_004891064) DWYASANSYQTPLLPEPDVQAVTRLTQTLLA AERPLIYIGARKAGKELEQLSKTLKIP  
*L. spicheri* POX (WP\_056963531) PVKTPNLVS-NSYQVVIDPAAIQATLALLKAAKHPLIYAGRLLGARAELVKFSEQFNLP  
*L. buchneri* POX1 (WP\_014939235) PTRTRPLTVA-DDFKQSDVPKAVDDTLKMIKEAKHPLIYAGRLLGARDTLTKFSEQFNIP  
*L. buchneri* POX2 (WP\_014939725) GYYSSAANFAKPELGTGSDEQVQALDLIDQAKKPVLYVGGTYGADEVMEFAKFKQIP  
*L. buchneri* POX3 (WP\_014940497) TYQPNVKSHQTPVYPSRPEDVEEAVKLI KEAKSPMIYFGIGAKDADELKEASEKFKMP  
*L. buchneri* POX4 (WP\_014940827) PYKTAKVLK-PATTMNVQKAVDQVYDLLKQAKHPVLWAGLGLKDARDEVVAFSERFSVP

: : \* : \* : \* \* \* : : : \* \*

*L. brevis* POX (WP\_011667107) VINTVPATGVIPNHPNALGTFGRGSGSGFEALQHTDLILFLGSEFPFAQF—WPKDI  
*L. plantarum* POX1 (YP\_004888816) LVSSVLAKGIIEDDYPAYLGGSTGRVAPKPGAEIGFSTDLILWVGNVPPFSIF—LFNKKA  
*L. plantarum* POX2 (YP\_004888818) VMNTVPATGVIPNHPNAIGTFGRGSGSGFEALQHADLILFLGSEFPFAF—WPKGI  
*L. plantarum* POX3 (YP\_004890281) IITGLAKGVIPDSFDGNMGSAYRAASKAADELMTDLVSVGADYSFAQIMY—TTHDF  
*L. plantarum* POX4 (YP\_004891062) VLSTAPATGIMPTDHPNFMGSRGRLGTPAFEVSAADLVFLVGTNPPFARY—LPQGI  
*L. plantarum* POX5 (YP\_004891064) LMSTYPAKGIADRYPAYLGSANRVAQKPANEALAQADVFLVGNVPPFAEVSKAFKNTR  
*L. spicheri* POX (WP\_056963531) VMNTVPATGVIPNHPNAIGTFGRGSGSGFEALQHTDLILFLGSEFPFAF—WPKNV  
*L. buchneri* POX1 (WP\_014939235) VMNSVPATGVISTDHPNFVGTGRLGSKSGFEALQADLILFLASEYPPFANY—WPQDT  
*L. buchneri* POX2 (WP\_014939725) VITLALGKEIIPYDFESLLGSAARVASKPANEALQDTLMLFVGSNPPFAEA—MFKPDV  
*L. buchneri* POX3 (WP\_014940497) LVSSFLAKGILPDDYPAYLGGSTGRVAPKPGSEAGFSTDLILWVGNVPPFSIF—LFNKHA  
*L. buchneri* POX4 (WP\_014940827) VLTTAPATGVMPDHPNFMGSRGRLGTPGFVETQAADLILAGTNYPPFSRF—LPKGI  
 :: : . . :: . : \* : \* . \* . \* : \* : : . : \* :

*L. brevis* POX (WP\_011667107) KIIQVNNASFDIGKVVPIIDYAVISDAKSYLQAMIATGETLPETTLTANRQNKQNWQAWL  
*L. plantarum* POX1 (YP\_004888816) KVIQIDIDSEKFGKRHHHTNVAIQADAKKALAAINAAGEARDDSAFYDAAVADKKNWQKQ  
*L. plantarum* POX2 (YP\_004888818) KIIQVNNNSFDIGKMVPIDYAVISDAQAYLQAMIATGETLPETAWLTTNRQNKRNWQKWL  
*L. plantarum* POX3 (YP\_004890281) KYVQIELDPGKFGRRHHLDLDFGVNGDAKVFIKRALALSEPASPYPYQAAKADMADWKQYL  
*L. plantarum* POX4 (YP\_004891062) KFIQVNNLADLKGQHDADITVLADAKEFFQALLQSEVTIKPTKFLKAAQRDKQNWNRWL  
*L. plantarum* POX5 (YP\_004891064) YFLQIDIDPAKLGKRHKTDIAVLADAKTLAAILAQVSERESTPWWQANLANVKNWRAYL  
*L. spicheri* POX (WP\_056963531) KIIQVNDNAFDIGKMPVDYAVLGDAAKAYLQAMIATGETLPETDWRANRENKANWDRAWL  
*L. buchneri* POX1 (WP\_014939235) KMIQVNNPYDIDGRIDVDYAVIADAKSYLQAMIDTGESRPKDAWLEANQENKQNWQKWL  
*L. buchneri* POX2 (WP\_014939725) KFIQIDNNPQVLGKRHKTDVAIADAKKTLQKFLDMGQTKEPSDWYAANVDNVTNWHYEYN  
*L. buchneri* POX3 (WP\_014940497) KVIQIDIQSEKLGERRHNDVSMMLADSKVALDAILEAGETRQPSAFYQACLANKENWNSWL  
*L. buchneri* POX4 (WP\_014940827) KVVQINNVEDLKGQHDIDLTLADAKPFLAKL—NEKEPIAPTFLKAAQKDKQNWDAWL  
 : \* : . : \* : : : \* : : : : : : \* :

*L. brevis* POX (WP\_011667107) AQLAADDSSQGLAPEAVTKKIAELAGPKDITYGVDGTGNVSEWAVRGLPMDQDQRFALISGLFA  
*L. plantarum* POX1 (YP\_004888816) ASFNDSTESPVRPEPIFDVLNQEASDKAVWAIDVGNVNFERLIRMHDDQKWATSGIYA  
*L. plantarum* POX2 (YP\_004888818) QQLAADDHDLAPEAVMHKVASMVGPRDITYGVDGTGNVSEWAVRGLPMDQEQRFALISGLFA  
*L. plantarum* POX3 (YP\_004890281) KKLSERTDPLEYEQVYQENRVAADDAVFSMDVGDNTINSFRFLKMNPKQLLTSALFA  
*L. plantarum* POX4 (YP\_004891062) KTIATDDQGLTAEVLEAIKDNATDDAVFGLDVGNNTEWAIRQLPLNKQQTFTMSAWYG  
*L. plantarum* POX5 (YP\_004891064) ASLEDKQEGPLQAYQLRAVNKIAEPDAIYSIDVGDINLNANRHLKLTSPNRHITSNLFA  
*L. spicheri* POX (WP\_056963531) GGVAQDDRDGLAPETVMRKVASMVGPDIDYGVDGTGNVSEWAVRGLPMNQDQRFALISGLFA  
*L. buchneri* POX1 (WP\_014939235) EQLADDDSDGLNAESVTKKIAELAGPNDITYAVDTGNVSEWAVRGLPMNKNRQFAISGLFA  
*L. buchneri* POX2 (WP\_014939725) DHMMNRTEGKLRPEFAPKEINRIAEKDAIFSIDVGDVTQNAVRLKTNHGHQPWITSGLFA  
*L. buchneri* POX3 (WP\_014940497) DSFKDSDQMPVRPEPIFDVLRNRTASNKAVFVAVDVGNDINFDRLINMHDDQKWATSGIYA  
*L. buchneri* POX4 (WP\_014940827) NKVADDDHDLAPEAVIRAIKENSDDNAVFGLDVGNLMLWSIRQLPFNHDQKLSMSAWFG  
 . : : : : \* : \* : : \* :

*L. brevis* POX (WP\_011667107) TMGYGLPAGMAGALSVP—DAQAWSLSGDDGFAMVAPDIIITEARYGLPVINVFSNQRFGF  
*L. plantarum* POX1 (YP\_004888816) TMGFGVPAALAAKVNYP—DRDVYSLSGDGAFAMLSEEILAQVKYNLHINIIVFSNETLGF  
*L. plantarum* POX2 (YP\_004888818) TMGFGPLPAGMAGALSVP—DSQAWSFSGDDGFAMVAPDIIITEARYGLPVINVFSNQRFGF  
*L. plantarum* POX3 (YP\_004890281) TMGAGVPGAIAAKMSYP—DRQAFNIAGDGAFSMVMQDLLTEVKYHLPINFIVTNSQTLNF  
*L. plantarum* POX4 (YP\_004891062) TMGFGPLPAGLAAQLNYP—KKQVWSISGDDGYAMVMPDLLTEVKYHLPVINVLENKVLGF  
*L. plantarum* POX5 (YP\_004891064) TMGVGIPGAIAAKLNYP—ERQVFNLAGDGGASMTQDLATQVQYHLPVINVFTNCQYGF  
*L. spicheri* POX (WP\_056963531) TMGYGLPAGLAGALDAAQGAQAWSFSGDDGFAMVAPDLITEARYQLPVINVFTNRRFGF  
*L. buchneri* POX1 (WP\_014939235) TMGFGPLPGLLAGALSVP—DAQAWSLSGDDGFAMVAPDILTEVRYKLPVINVFSNDRFGF  
*L. buchneri* POX2 (WP\_014939725) TMGVGLPGSIAAKLSYP—DRQVFNLTGDAAAMVMQDLSTQVGYKLPVINVFSNEALGF  
*L. buchneri* POX3 (WP\_014940497) TMGFALPASIAAKLEY—DRDVYSLSGDDGFAMLEEVMTQVKYGLHIVNIIFTNETLGF  
*L. buchneri* POX4 (WP\_014940827) TMGYALPASIAAGKLSYP—DRQVFSISGDDGFMSVTQDLTQVQYQLPVIINVLENGAFGY  
 \*\*\* . : \* : . : . : : \* : \* : : : \* : \* : : \* :

|                                         |                                                                |
|-----------------------------------------|----------------------------------------------------------------|
| <i>L. brevis</i> POX (WP_011667107)     | IYREQVDTK-QHLYGVDLTDADWAKVAEGLGGIGFTVTNNQEVAQVFDQIKALQAQGNRK   |
| <i>L. plantarum</i> POX1 (YP_004888816) | IEAEQTDDSHQPLSGVDLPDWDWAKVGEYGVYTVRTKAEPKQALEDAK-----KTDK      |
| <i>L. plantarum</i> POX2 (YP_004888818) | IYREQVDTK-QHLYGVDLTDADWAKVADGLGGIGFTVQNNQEVEVTFVDQIKALQAKGNKR  |
| <i>L. plantarum</i> POX3 (YP_004890281) | IKSEQEDVP-QPYYGIDLIDADFAKIAEGMGVKGIRVEHFDQLHAAFETAMTE--LKAGR   |
| <i>L. plantarum</i> POX4 (YP_004891062) | IQHEKLLAN-QAPYGYDLIGADWAKMADNMGAIGFKVTNLKELKATFQKVTQLQQNGNQL   |
| <i>L. plantarum</i> POX5 (YP_004891064) | IKDEQEDTNQNDFIGVEFNDIDFSKIADGVHMQAFRVNKIEQLPDVFEQAK-A--IAQHE   |
| <i>L. spicheri</i> POX (WP_056963531)   | IYNEQVTSQ-QHLYGVDLTEANWAKVAEGLGGIGFTVVRNKVDVENAFNHIQDLQAKGNTK  |
| <i>L. buchneri</i> POX1 (WP_014939235)  | IWYEQMQTK-QHFYGVDLNDADWAKVAEGLGAIIGFTVKS IKDLDEVFAKIKDLQASGNQK |
| <i>L. buchneri</i> POX2 (WP_014939725)  | IEDEQEDDS-HEWFGISLPQTFDAKVAEAQGMGLGITVTSVDQMKPAFDKAVEE--TKAGK  |
| <i>L. buchneri</i> POX3 (WP_014940497)  | IEAEQTDTHQPLSGVDLPDNTWAQVETKMGAVSYTVHTKEDMQKALKDAE-----NTDK    |
| <i>L. buchneri</i> POX4 (WP_014940827)  | IQHEKITAS-QEPYGIHFIFGANWAGFADDMGAIGIQVTDQRSLKGAPEKIKELQVNGNTK  |
|                                         | * *: : *: : ::: . . . * . . . :                                |
|                                         |                                                                |
| <i>L. brevis</i> POX (WP_011667107)     | PIVVNAVINKNDPIGTAFMPLDPQLYGEETVAAYAKENHIDRQQPALGELLRAQGDTL-    |
| <i>L. plantarum</i> POX1 (YP_004888816) | PVV IDVKLTHAMPFTTEHMYLDDAWQDKDKIAEFVKKYDA--QALKPFSYFLKQAQTN--  |
| <i>L. plantarum</i> POX2 (YP_004888818) | PIVVNAVINKNDPIGTAYMPLDPQLYGEQAEVDAYAKANHIDIKEQPSLGALLRAQGDQL-  |
| <i>L. plantarum</i> POX3 (YP_004890281) | PVLIDAKITDKRGLPVEILDVDPTKTSASVSFAFKEYDA--NELKPLTSYFKEFNVE--    |
| <i>L. plantarum</i> POX4 (YP_004891062) | PIVIDAKIKNVDPIDTSFVPVDPENFDADTI AKYRERYGIAEADQPALSQLLNEL-----  |
| <i>L. plantarum</i> POX5 (YP_004891064) | PVLIDAVITGDRPLPAEKRLDSATSSAADIEAFKQRYEA--QDLQPLSTYLKQFGLDDL    |
| <i>L. spicheri</i> POX (WP_056963531)   | PIVVNAVIKDDPIETAFMPLDPQLYGGQDAVDAYAKKNHLDTRQQPSLGELLRAKGDNL-   |
| <i>L. buchneri</i> POX1 (WP_014939235)  | PIVIDAKIKQDDPVATAFMPLDAQKYGEETAEGFAKQYHIDRQQPSLEELLRSKEK---    |
| <i>L. buchneri</i> POX2 (WP_014939725)  | PVLIDVKITNERIPVEKLTLDPKFDQKTIDDFKKRYA--EDLVPLSAFLKQHGK--       |
| <i>L. buchneri</i> POX3 (WP_014940497)  | PVV IDVKLTHEMPLTTQHMFLDTSWQDKDKVAEYVKKYQA--QDLKPLSYFLKEAENHQL  |
| <i>L. buchneri</i> POX4 (WP_014940827)  | PILIDAKVKNQDPVDTSFMPIDPDQFQAAIDSYTKQSNL--FDQPALSTLLKEESNS--    |
|                                         | *::: . : . . : :* . : : : : :                                  |
|                                         |                                                                |
| <i>L. brevis</i> POX (WP_011667107)     | -----                                                          |
| <i>L. plantarum</i> POX1 (YP_004888816) | -----                                                          |
| <i>L. plantarum</i> POX2 (YP_004888818) | -----                                                          |
| <i>L. plantarum</i> POX3 (YP_004890281) | -----                                                          |
| <i>L. plantarum</i> POX4 (YP_004891062) | -----                                                          |
| <i>L. plantarum</i> POX5 (YP_004891064) | QHQIGGGGF                                                      |
| <i>L. spicheri</i> POX (WP_056963531)   | -----                                                          |
| <i>L. buchneri</i> POX1 (WP_014939235)  | -----                                                          |
| <i>L. buchneri</i> POX2 (WP_014939725)  | -----                                                          |
| <i>L. buchneri</i> POX3 (WP_014940497)  | QTN-----                                                       |
| <i>L. buchneri</i> POX4 (WP_014940827)  | -----                                                          |

FIG S2 Sequence alignment of the POX (WP\_011667107) from *L. brevis* ATCC367, POX1 (YP\_004888816), POX2 (YP\_004888818), POX3 (YP\_004890281), POX4 (YP\_004891062), POX5 (YP\_004891064) from *L. plantarum* WCFS1, POX (WP\_056963531) from *L. spicheri* DSM 15429, POX1 (WP\_014939235), POX2 (WP\_014939725), POX3 (WP\_014940497), POX4 (WP\_014940827) from *L. buchneri* CD034. Among these sequences, the POX of *L. brevis* ATCC367 was closed

to the POX2 of *L. plantarum* WCFS1, POX1 of *L. buchneri* CD034 and POX from *L. spicheri* DSM 15429, with 86.2%, 75.43% and 73.08% identities.
